# Supplementary material for: Multi-scale crystallographic ordering in the cold-water coral Lophelia pertusa
Source: PubMed Central journal article supplement (PMC5566427; doi:10.1038/s41598-017-09344-5), 2017-08-21

« Multi-scale crystallographic ordering in the cold-water coral *Lophelia pertusa* », by Mouchi V., Vonlanthen P., Verrecchia E.P., Crowley Q.G.

**Supplementary Figure 1:** Scanning electron microscope image of the studied *Lophelia pertusa* specimen. After EBSD analysis, the section was etched with formic acid 2% for 50 seconds and carbon coated. Secondary electron images were taken at the Université Pierre et Marie Curie, Paris, France, using a Zeiss Supra 55VP FE-SEM operated at an acceleration voltage of 3 kV, a probe current of 0.275 nA, and a working distance of 3.3 mm. Orientations of the aragonite needles on this figure correspond to the EBSD results.



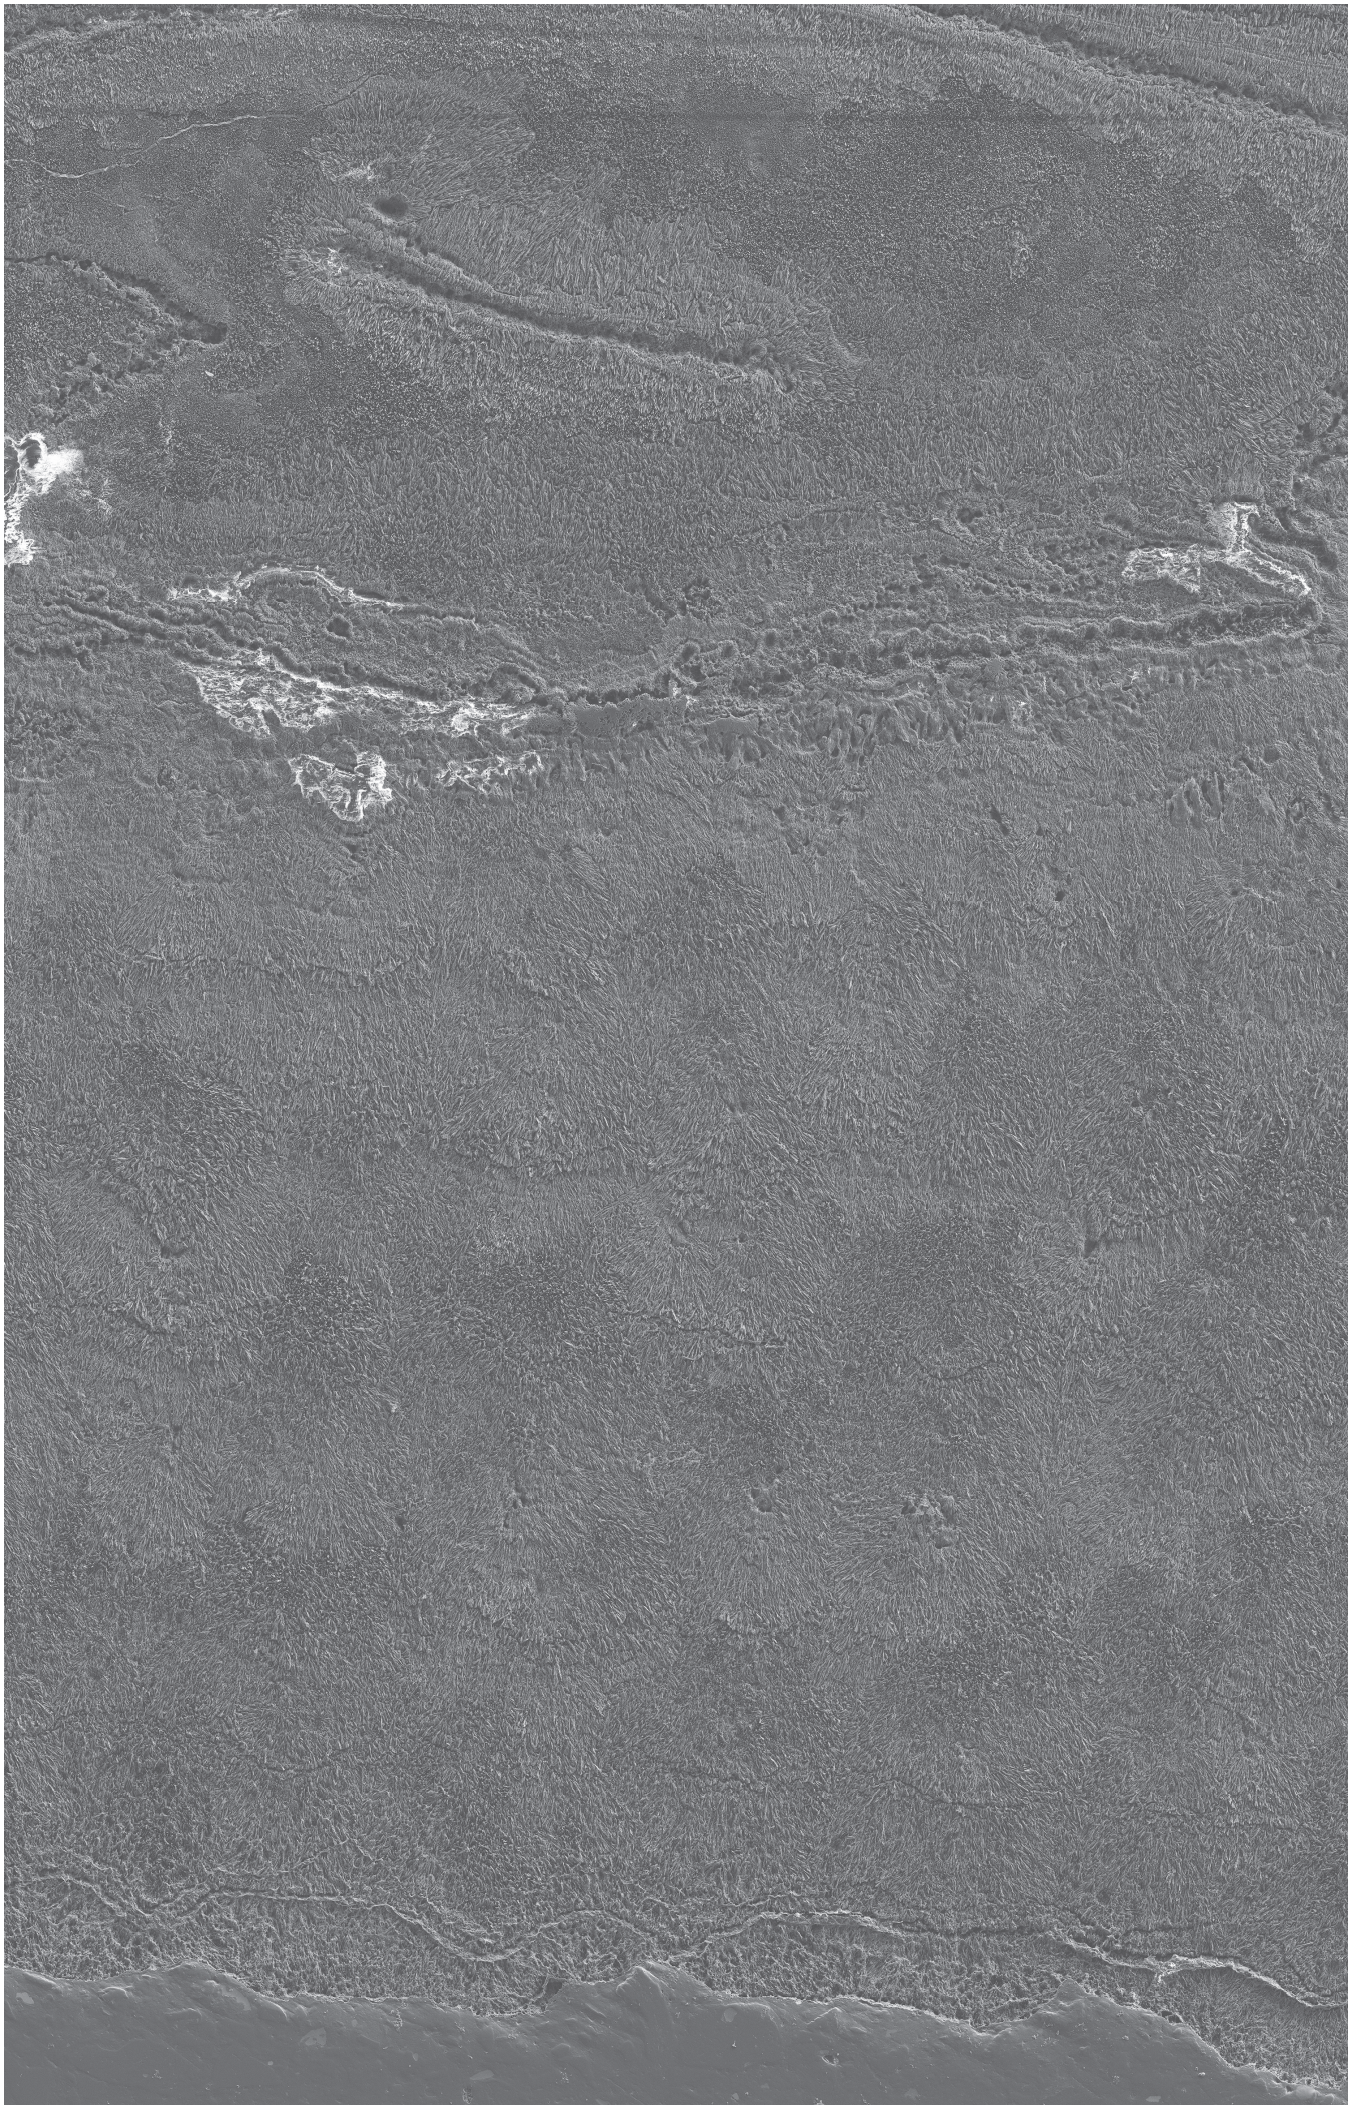

Supplement: 41598_2017_9344_MOESM1_ESM.pdf [file 41598_2017_9344_MOESM1_ESM.pdf]
